# Supplementary material for: The reduction reaction of carbon dioxide on a precise number of Fe atoms anchored on two-dimensional biphenylene
Source: Royal Society of Chemistry journal article supplement (doi:10.1039/d2cp02911a), 2022-01-01
Supplement: d2cp02911a1.pdf [file d2cp02911a1.pdf]

## Reduction reaction of carbon dioxide on precise number of Fe atoms anchored on two-dimensional biphenylene

Na Xing<sup>a</sup>, Ziyang Liu<sup>a</sup>, Zhongwei Wang<sup>a</sup>, Yan Gao<sup>\*,a</sup>, Qingfang Li<sup>\*,b</sup> and Haifeng Wang<sup>\*,a</sup>

<sup>a</sup>*Department of Physics, College of Science, Shihezi University, Xinjiang 832003, China*

<sup>b</sup>*School of Physics & Optoelectronic Engineering, Nanjing University of Information Science & Technology, Nanjing 210044, China*

### Table of Contents

#### Consideration of electrochemical proton-electron transfer

#### Consideration of the solvent effect on the catalytic behavior

**Fig. S1** The eight different stable adsorption configurations and relative energies of single Fe atom embedded on the BP monolayer.

**Fig. S2** The optimized structures and relative energies of Fe<sub>2-3</sub> anchored on BP sheet.

**Fig. S3** Partial density of states (PDOS) of the active C sites of 2D BP monolayer with the corresponding *p*-band center ( $\epsilon_p$ ).

**Fig. S4** Evolution of the total energy of ab initio molecular dynamics (AIMD) simulation for Fe<sub>n</sub> (*n* = 1–3) doped BP sheet at 300 and 600 K. The inset are snapshot structures of Fe<sub>1-3</sub>@BP catalysts at 10 ps.

**Fig. S5** Structures of Fe<sub>n</sub> (*n* = 1–3) doped BP sheet in a water environment after AIMD simulations at 300K for 10 ps and variations of temperature with simulation time for Fe<sub>1-3</sub>@BP catalysts.

**Fig. S6** Structures before and after CO<sub>2</sub> adsorption on pure BP sheet, the distances between CO<sub>2</sub> and BP substrate, the adsorption energies and the bond angles of the O–C–O for each system are also given. The C, O atoms are shown in brown, red colors, respectively.

**Fig. S7** Calculated free energy profiles for CO desorption and further hydrogenation on Fe<sub>1</sub>@BP.

**Fig. S8** Calculated free energy profiles for CO desorption and further hydrogenation on Fe<sub>2</sub>@BP.

**Fig. S9** Calculated free energy profiles for CO desorption and further hydrogenation on Fe<sub>3</sub>@BP.

**Fig. S10** Calculated free energy profiles for HCOOH desorption and further hydrogenation on Fe<sub>1</sub>@BP.

**Fig. S11** Calculated free energy profiles for HCOOH desorption and further hydrogenation on Fe<sub>2</sub>@BP.

**Fig. S12** Calculated free energy profiles for HCOOH desorption and further hydrogenation on Fe<sub>3</sub>@BP.

**Fig. S13** (a) Adsorption energies of reaction molecules on Fe<sub>2</sub>@BP and (b) free energy diagram of CO<sub>2</sub> reduction on Fe<sub>2</sub>@BP by considering an implicit solvent model.

**Table S1** The adsorption energies, Zero-point energy (ZPE), entropic corrections (TS) at T = 298 K to the free energies and (ZPE - TS) values of the gas-phase. The Zero-point energy (ZPE) and entropic corrections (TS) at T = 298 K to the free energies values were taken from NIST-JANAF thermodynamic table.<sup>2</sup>

**Table S2** The adsorption energy, Zero-point energy (ZPE), entropic corrections (TS) at T = 298 K to the free energies and (ZPE - TS) values of the adsorbed species (with\*). The Zero-point energy (ZPE) and entropic corrections (TS) at T = 298 K to the free energies values were obtained by calculating the vibration frequency of the reaction intermediate.

**Table S3** The free energy values of Fe<sub>n</sub> (n = 1-3) doped BP sheet in Fig. 5a,c,e.

\* Corresponding authors. Email: gaoy@shzu.edu.cn, qingfangli@nuist.edu.cn or whfeng@shzu.edu.cn.

## Consideration of electrochemical proton-electron transfer

In this work, we employed the computational hydrogen electrode (CHE) model to include the electrode potential correction to the free energy of each state, by considering the electrochemical proton-electron transfer being a function to the applied electrical potential.<sup>1</sup> The protons and electrons are in equilibrium with hydrogen at 0 V, all pH values and 1 atm of pressure. The reaction is used as the reference potential at any pH:

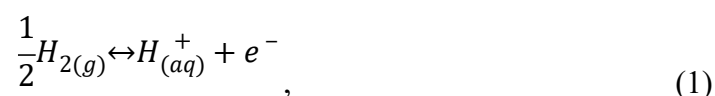

Under this conditions, the chemical potential ( $\mu$ ) of  $1/2H_2$  (g) is equivalent to that of a proton-electron pair in aqueous solution. Therefore, the energetics of  $H_2$  (g) is used as electrochemical reference. The effect of an external potential over this equilibrium can be included as a term  $eU$  in the following way, where  $U$  is the electrode potential:

$$\frac{1}{2}\mu(H_2) - eU = \mu(H^+ + e^-) , \quad (2)$$

## Consideration of the solvent effect on the catalytic behavior

The electroreduction of  $CO_2$  usually takes place in the aqueous condition, to simulate the reaction in  $Fe_{1-3}@BP$  catalysts, we employed the self-consistent continuum solvation model incorporated implicitly with the Poisson-Boltzmann model as implemented in VASPsol.<sup>2,3</sup> The relative dielectric constant corresponding to the medium is selected as  $\epsilon_r = 78.4$ ,<sup>4</sup> which corresponds to the value of pure water.

|                    | H <sub>1</sub>                                                                      | H <sub>2</sub>                                                                      | H <sub>3</sub>                                                                       | T <sub>1</sub>                                                                        |
|--------------------|-------------------------------------------------------------------------------------|-------------------------------------------------------------------------------------|--------------------------------------------------------------------------------------|---------------------------------------------------------------------------------------|
| Initial            | 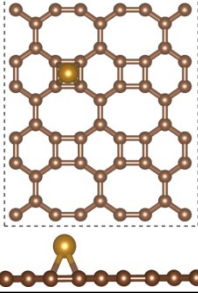   |    |    |    |
| Final              |   |   |   |   |
| Relative energy/eV | 0 □                                                                                 | 0.09                                                                                | 0.45                                                                                 | 0.01                                                                                  |
|                    | T <sub>2</sub>                                                                      | B <sub>1</sub>                                                                      | B <sub>2</sub>                                                                       | B <sub>3</sub>                                                                        |
| Initial            |  |  |  |  |
| Final              |  |  |  |  |
| Relative energy/eV | 0.09                                                                                | 0.01                                                                                | 0.01                                                                                 | 0.09                                                                                  |

**Fig. S1** The eight different stable adsorption configurations and relative energies of single Fe atom embedded on the BP monolayer.

|                    |      |      |      |      |
|--------------------|------|------|------|------|
| $\text{Fe}_2@BP$   |      |      |      |      |
| Relative energy/eV | 0    | 0.04 | 0.96 | 0.59 |
| $\text{Fe}_2@BP$   |      |      |      |      |
| Relative energy/eV | 0.57 | 1.02 | 0.29 | 0.57 |
| $\text{Fe}_3@BP$   |      |      |      |      |
| Relative energy/eV | 0    | 0.49 | 0.50 | 0.87 |
| $\text{Fe}_3@BP$   |      |      |      |      |
| Relative energy/eV | 1.04 | 0.62 | 1.18 | 0.87 |

|                     |                                                                                   |                                                                                   |  |  |
|---------------------|-----------------------------------------------------------------------------------|-----------------------------------------------------------------------------------|--|--|
| Fe <sub>3</sub> @BP | 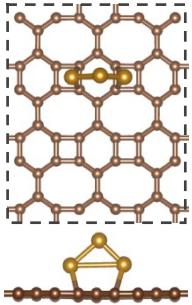 |  |  |  |
| Relative energy/eV  | 1.43                                                                              | 3.03                                                                              |  |  |

**Fig. S2** The optimized structures and relative energies of Fe<sub>2-3</sub> anchored on BP sheet.

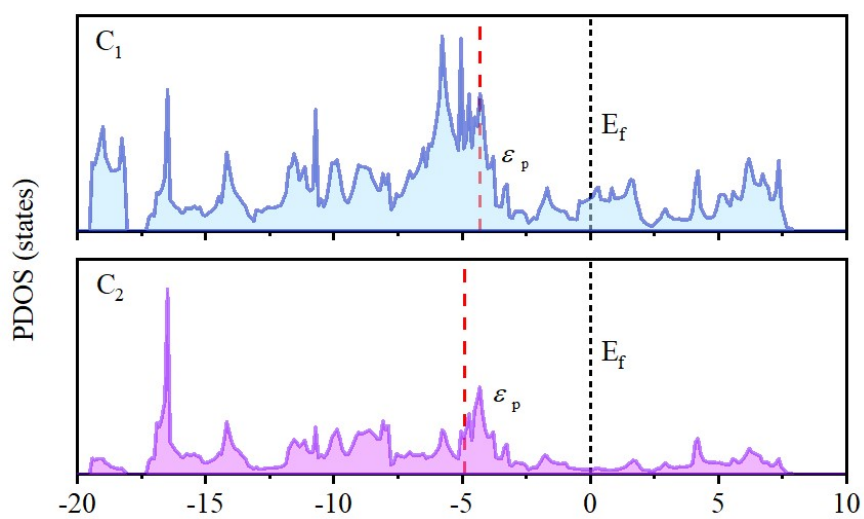

**Fig. S3** Partial density of states (PDOS) of the active C sites of 2D BP monolayer with the corresponding  $p$ -band center ( $\varepsilon_p$ ).

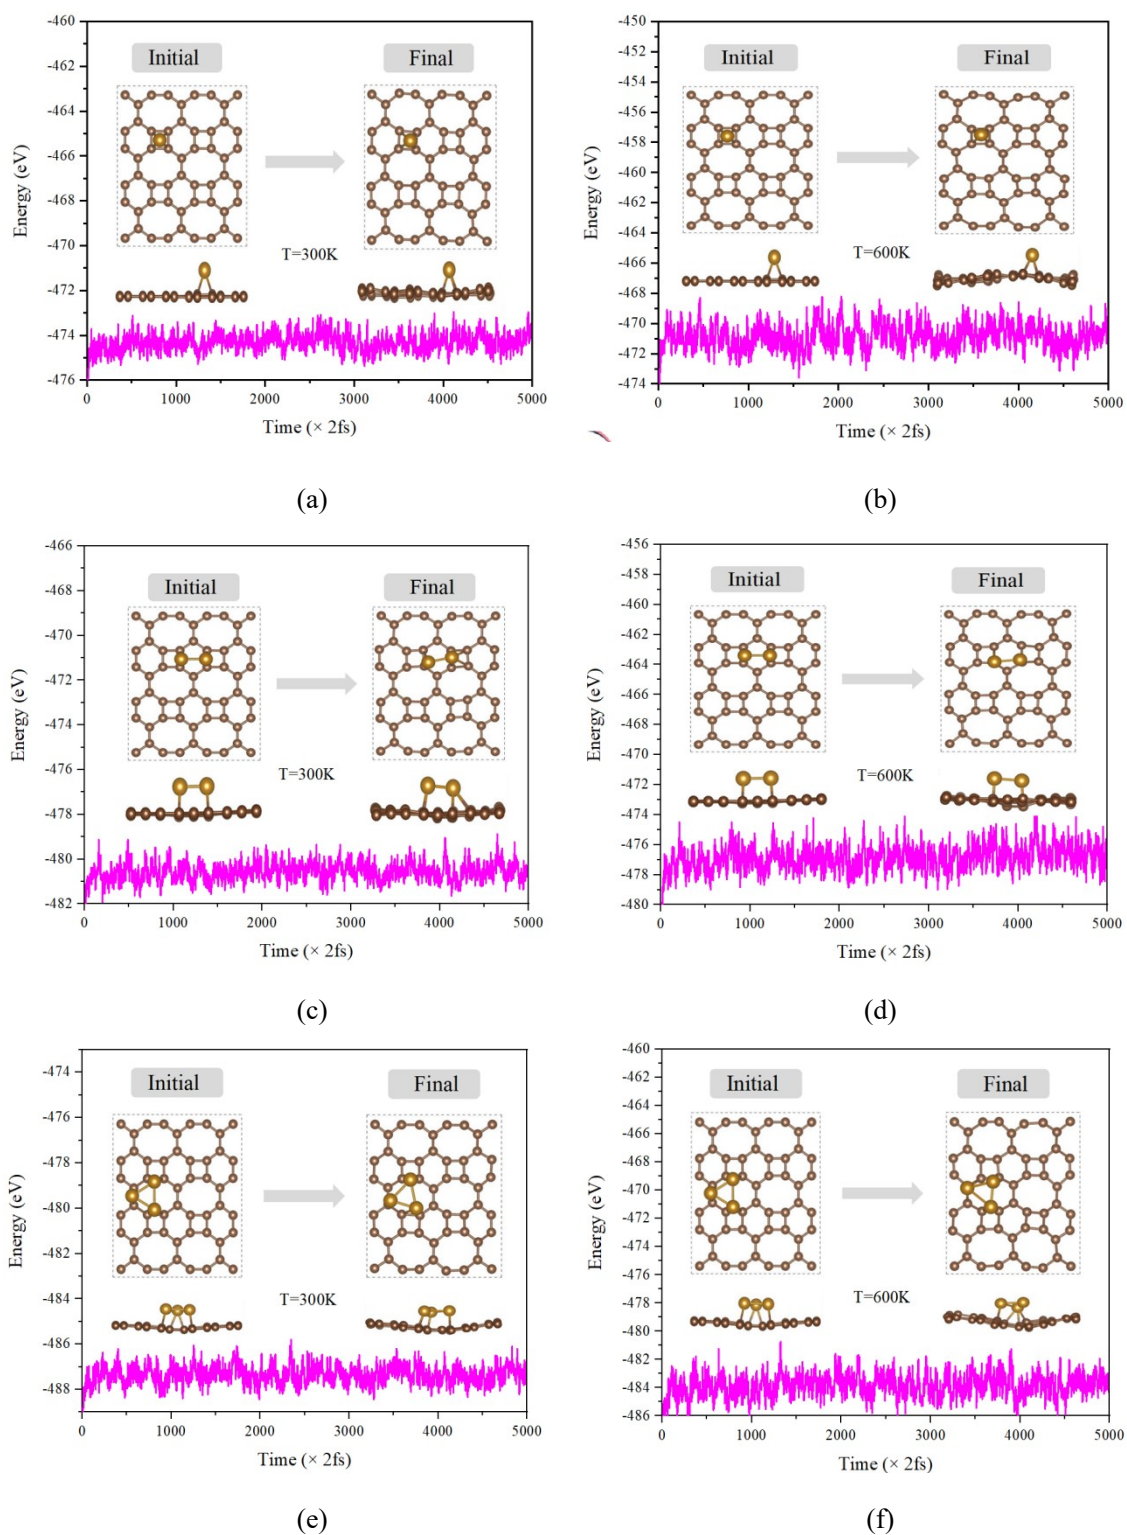

**Fig. S4** Evolution of the total energy of ab initio molecular dynamics (AIMD) simulation for  $\text{Fe}_n$  ( $n = 1-3$ ) doped BP sheet at 300 and 600 K. The inset are snapshot structures of  $\text{Fe}_{1-3}@\text{BP}$  catalysts

at

10

ps.



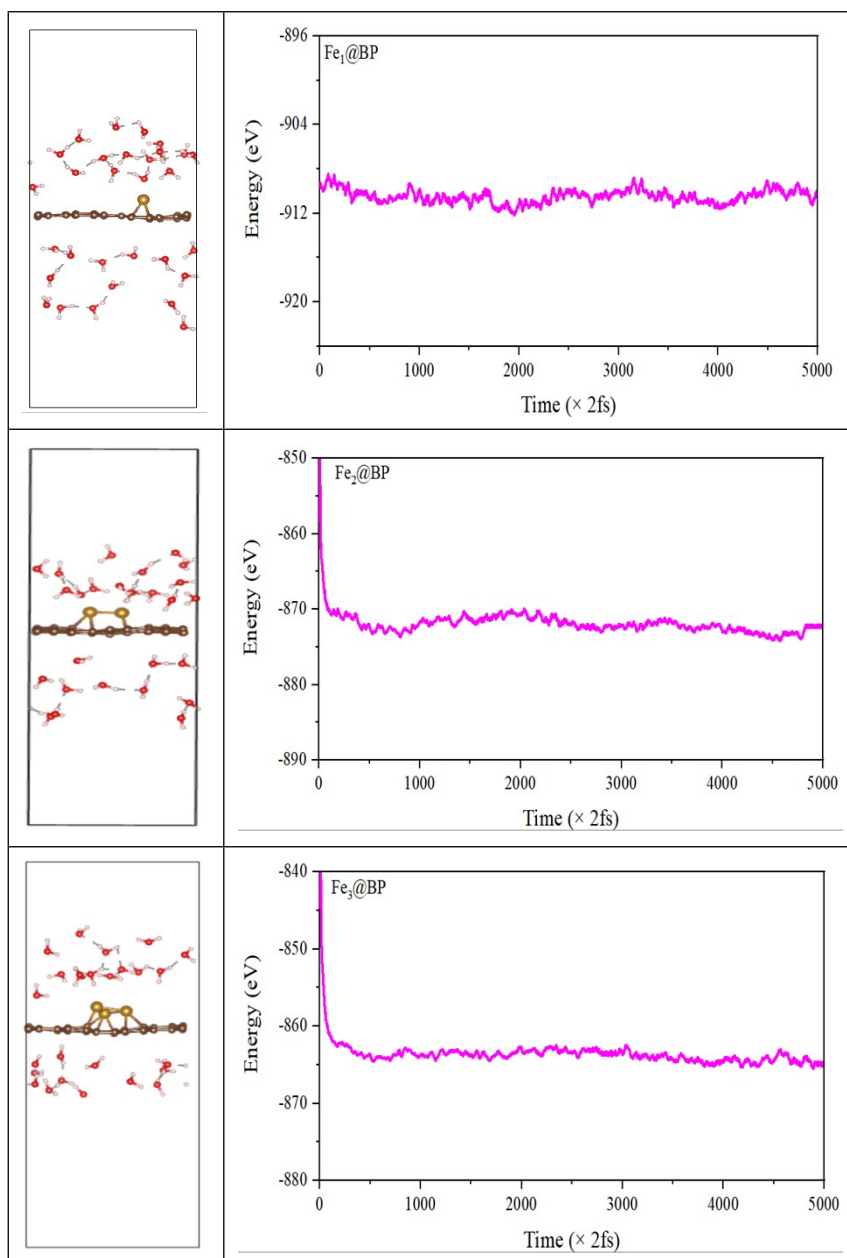

**Fig. S5** Structures of  $\text{Fe}_n$  ( $n = 1-3$ ) doped BP sheet in a water environment after AIMD simulations at 300K for 10 ps and variations of temperature with simulation time for  $\text{Fe}_{1-3}@BP$  catalysts.

|                            |                                                                                     |                                                                                     |                                                                                      |                                                                                       |
|----------------------------|-------------------------------------------------------------------------------------|-------------------------------------------------------------------------------------|--------------------------------------------------------------------------------------|---------------------------------------------------------------------------------------|
| Initial                    | 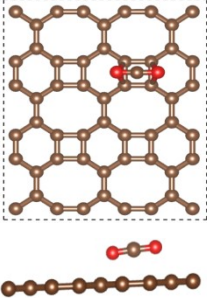   |    |    |    |
|                            | O-C-O (°)                                                                           | 180°                                                                                | 180°                                                                                 | 180°                                                                                  |
| L(Å)                       | 1.84                                                                                | 1.42                                                                                | 1.71                                                                                 | 1.82                                                                                  |
| Final                      |    |    |    |    |
|                            | O-C-O (°)                                                                           | 179.76°                                                                             | 179.96°                                                                              | 179.79°                                                                               |
| L(Å)                       | 3.39                                                                                | 3.29                                                                                | 3.32                                                                                 | 3.33                                                                                  |
| $E_{\text{ads}}/\text{eV}$ | -0.42                                                                               | -0.42                                                                               | -0.41                                                                                | -0.41                                                                                 |
| Initial                    |  |  |  |  |
|                            | O-C-O (°)                                                                           | 180°                                                                                | 180°                                                                                 | 180°                                                                                  |
| L(Å)                       | 1.80                                                                                | 1.75                                                                                | 1.87                                                                                 | 1.93                                                                                  |
| Final                      |  |  |  |  |
|                            | O-C-O (°)                                                                           | 179.56°                                                                             | 179.72°                                                                              | 179.87°                                                                               |
| L(Å)                       | 3.46                                                                                | 3.30                                                                                | 3.39                                                                                 | 3.34                                                                                  |
| $E_{\text{ads}}/\text{eV}$ | -0.42                                                                               | -0.41                                                                               | -0.43                                                                                | -0.42                                                                                 |

|                      |                                                                                   |                                                                                   |                                                                                    |                                                                                     |
|----------------------|-----------------------------------------------------------------------------------|-----------------------------------------------------------------------------------|------------------------------------------------------------------------------------|-------------------------------------------------------------------------------------|
| Initial              | 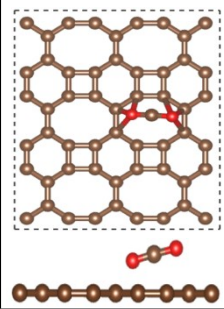 |  |  |  |
|                      | O-C-O (°)                                                                         | 180°                                                                              | 180°                                                                               | 180°                                                                                |
| L(Å)                 | 1.69                                                                              | 1.41                                                                              | 1.39                                                                               | 1.59                                                                                |
| Final                |  |  |  |  |
|                      | O-C-O (°)                                                                         | 179.73°                                                                           | 179.89°                                                                            | 179.96°                                                                             |
| L(Å)                 | 3.45                                                                              | 3.22                                                                              | 3.29                                                                               | 3.26                                                                                |
| E <sub>ads</sub> /eV | -0.41                                                                             | -0.41                                                                             | -0.43                                                                              | -0.41                                                                               |

**Fig. S6** Structures before and after CO<sub>2</sub> adsorption on pure BP sheet, the distances between CO<sub>2</sub> and BP substrate, the adsorption energies and the bond angles of the O-C-O for each system are also given. The C, O atoms are shown in brown, red colors, respectively.

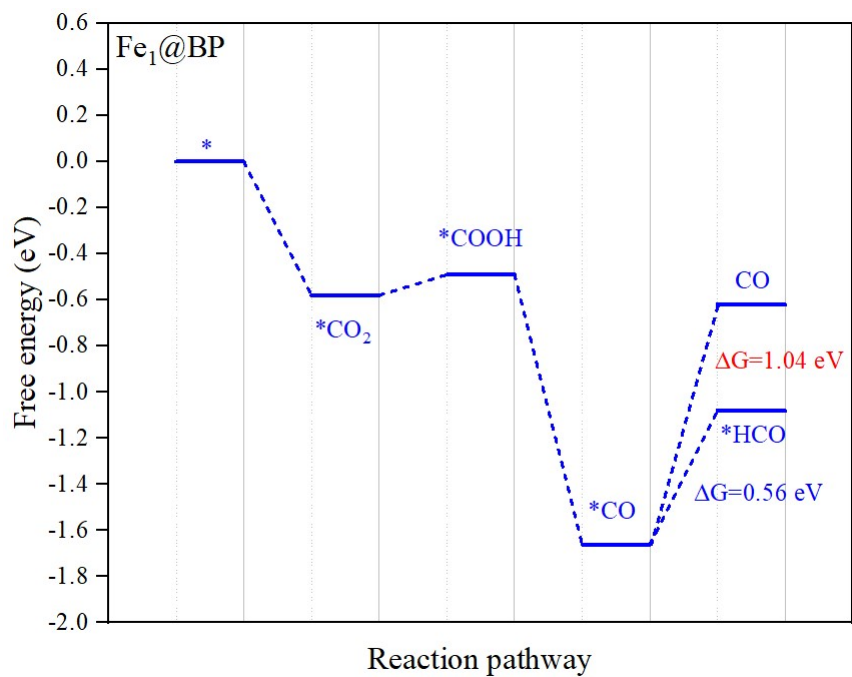

**Fig. S7** Calculated free energy profiles for CO desorption and further hydrogenation on  $\text{Fe}_1@BP$ .

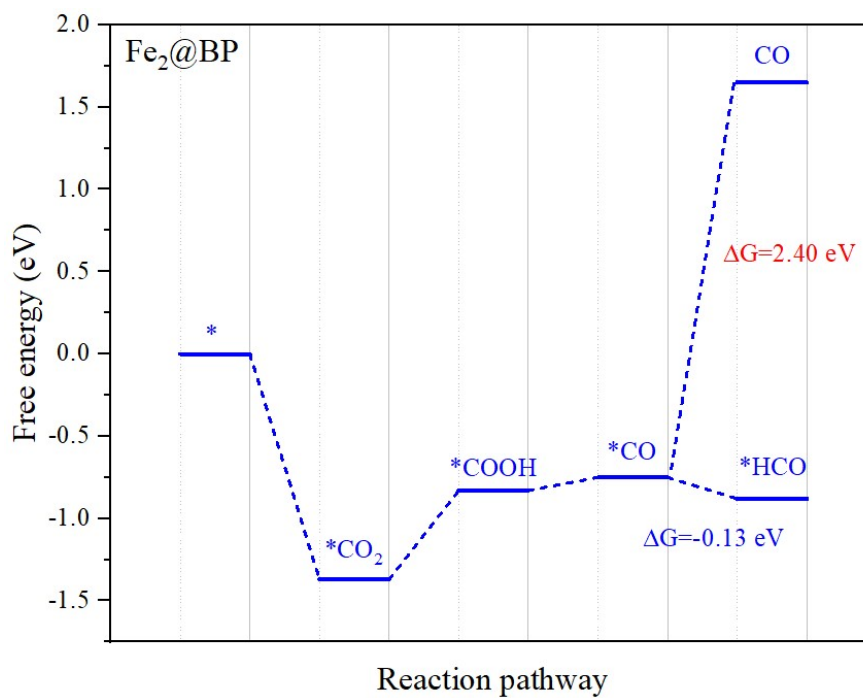

**Fig. S8** Calculated free energy profiles for CO desorption and further hydrogenation on  $\text{Fe}_2@BP$ .

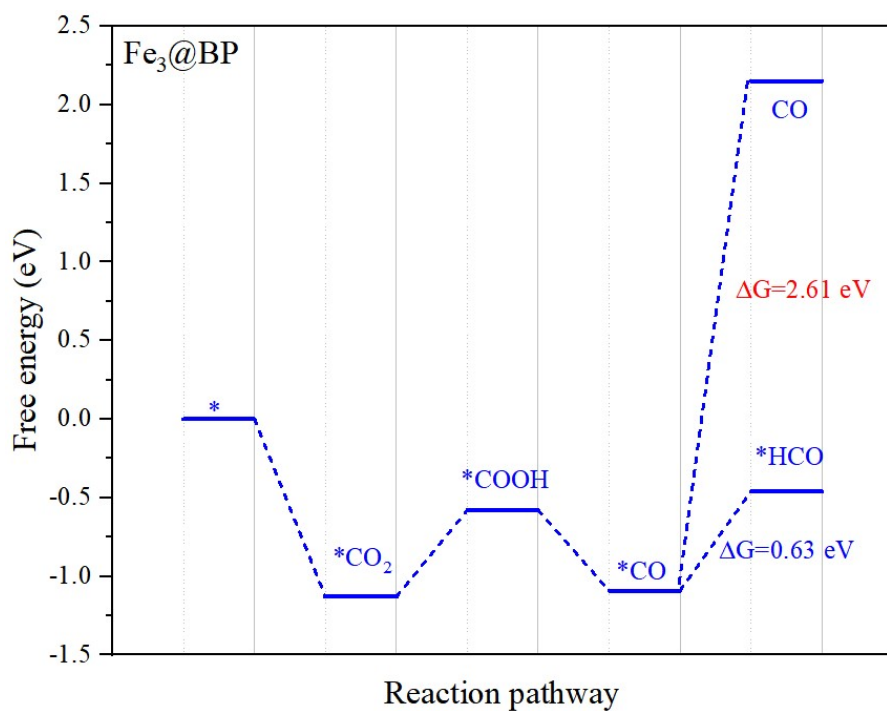

**Fig. S9** Calculated free energy profiles for CO desorption and further hydrogenation on  $\text{Fe}_3@BP$ .

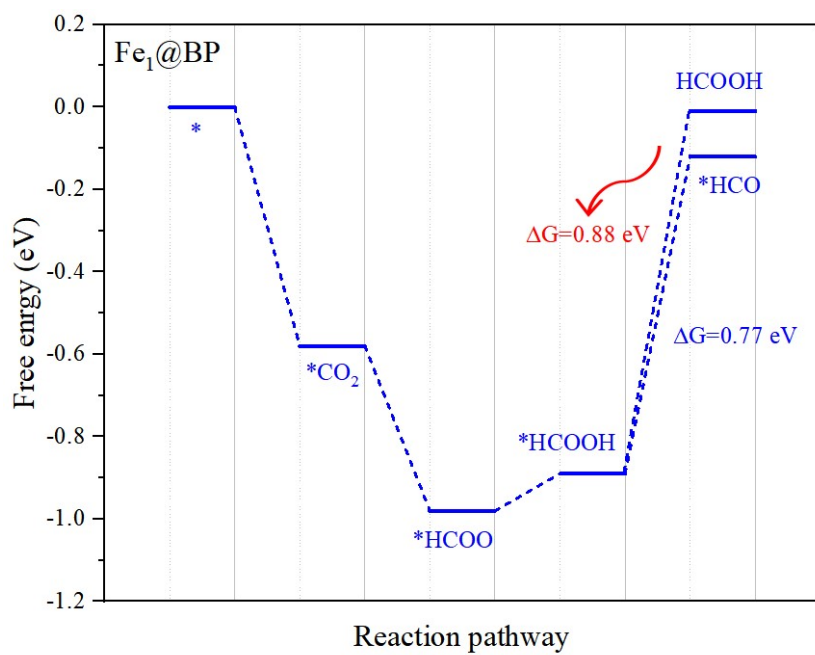

**Fig. S10** Calculated free energy profiles for HCOOH desorption and further hydrogenation on  $\text{Fe}_1@BP$ .

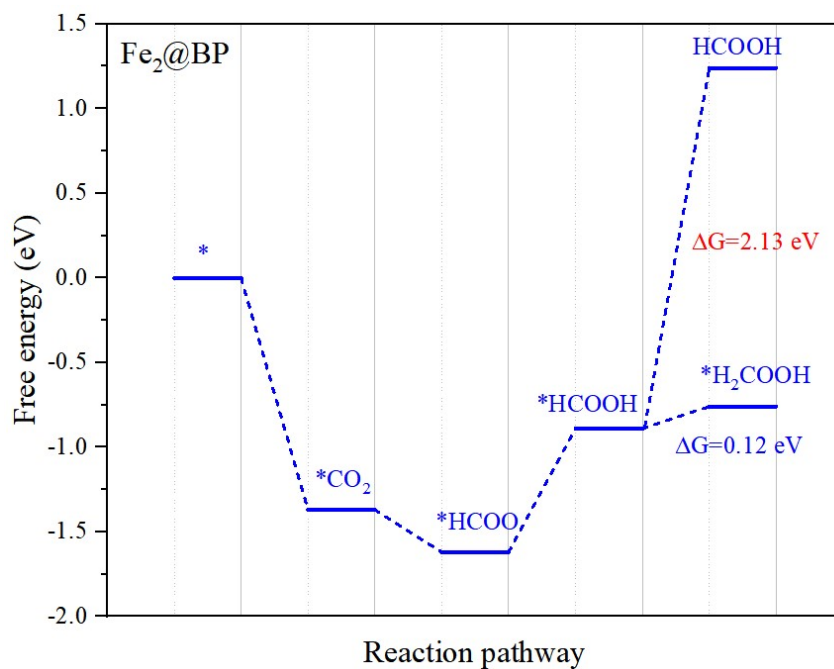

**Fig. S11** Calculated free energy profiles for HCOOH desorption and further hydrogenation on Fe<sub>2</sub>@BP.

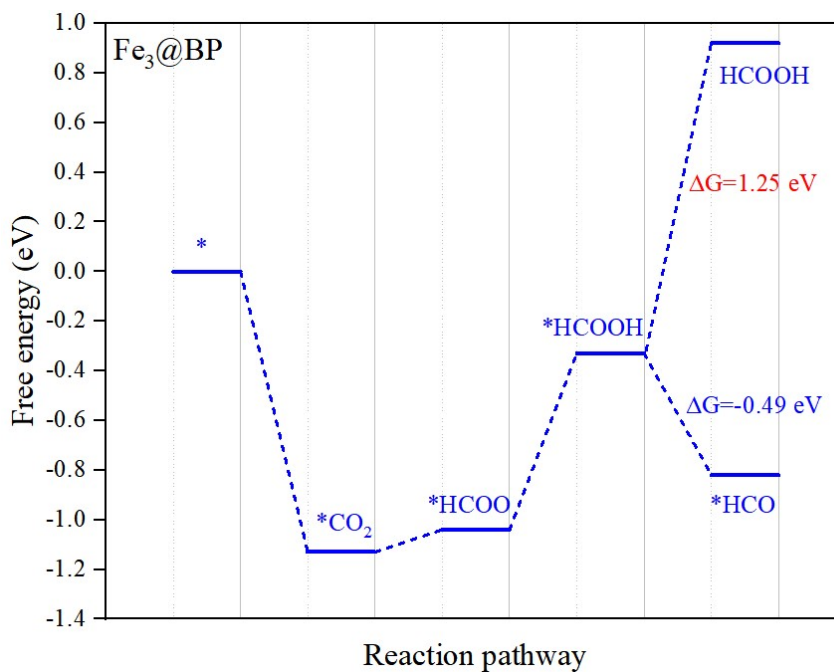

**Fig. S12** Calculated free energy profiles for HCOOH desorption and further hydrogenation on Fe<sub>3</sub>@BP.

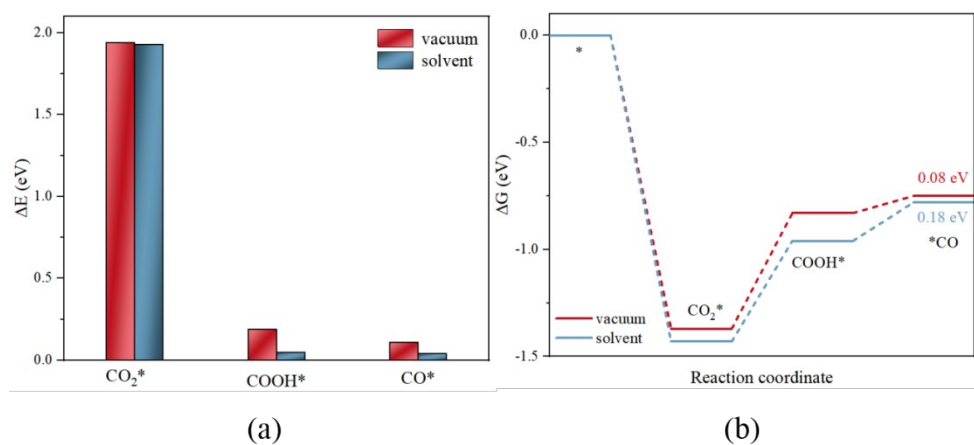

**Fig. S13** (a) Adsorption energies of reaction molecules on  $\text{Fe}_2@BP$  and (b) free energy diagram of  $\text{CO}_2$  reduction on  $\text{Fe}_2@BP$  by considering an implicit solvent model.

**Table S1** The adsorption energies, Zero-point energy (ZPE), entropic corrections (TS) at T = 298 K to the free energies and (ZPE – TS) values of the gas-phase. The Zero-point energy (ZPE) and entropic corrections (TS) at T = 298 K to the free energies values were taken from NIST-JANAF thermodynamic table.<sup>5</sup>

| species            | $E_{\text{ads}}$ (eV) | ZPE (eV) | TS (eV) | ZPE – TS (eV) |
|--------------------|-----------------------|----------|---------|---------------|
| H <sub>2</sub>     | -6.77                 | 0.27     | 0.42    | -0.15         |
| H <sub>2</sub> O   | -14.22                | 0.58     | 0.65    | -0.07         |
| CO <sub>2</sub>    | -22.95                | 0.31     | 0.65    | -0.34         |
| CO                 | -14.77                | 0.14     | 0.67    | -0.53         |
| HCOOH              | -29.88                | 0.90     | 1.02    | -0.12         |
| H <sub>2</sub> CO  | -22.13                | 0.70     | 0.66    | 0.04          |
| CH <sub>3</sub> OH | -30.22                | 1.35     | 0.79    | 0.56          |
| CH <sub>4</sub>    | -24.04                | 1.20     | 0.60    | 0.60          |



**Table S2** The adsorption energy, Zero-point energy (ZPE), entropic corrections (TS) at T = 298 K to the free energies and (ZPE – TS) values of the adsorbed species (with\*). The Zero-point energy (ZPE) and entropic corrections (TS) at T = 298 K to the free energies values were obtained by calculating the vibration frequency of the reaction intermediate.

|                     |                       |          |         |               |
|---------------------|-----------------------|----------|---------|---------------|
| Fe <sub>1</sub> @BP | E <sub>ads</sub> (eV) | ZPE (eV) | TS (eV) | ZPE – TS (eV) |
| *CO <sub>2</sub>    | –503.64               | 0.51     | 0.28    | 0.23          |
| *COOH               | –507.18               | 0.67     | 0.26    | 0.41          |
| *CO                 | –512.15               | 1.12     | 0.37    | 0.75          |
| *HCO                | –500.36               | 0.50     | 0.16    | 0.34          |
| *H <sub>2</sub> CO  | –503.48               | 0.79     | 0.15    | 0.64          |
| *H <sub>2</sub> COH | –507.21               | 1.11     | 0.18    | 0.93          |
| *CH <sub>3</sub> OH | –512.10               | 1.29     | 0.34    | 0.95          |
| Fe <sub>1</sub> @BP | E <sub>ads</sub> (eV) | ZPE (eV) | TS (eV) | ZPE – TS (eV) |
| *CO <sub>2</sub>    | –503.64               | 0.52     | 0.28    | 0.24          |
| *HCOO               | –507.80               | 0.79     | 0.26    | 0.53          |
| *HCOOH              | –511.31               | 0.96     | 0.29    | 0.67          |
| *HCO                | –514.03               | 1.14     | 0.43    | 0.71          |
| *H <sub>2</sub> CO  | –504.33               | 0.82     | 0.18    | 0.64          |
| *H <sub>3</sub> CO  | –508.24               | 1.12     | 0.21    | 0.91          |
| *O                  | –511.27               | 1.45     | 0.23    | 1.22          |
| *OH                 | –492.12               | 0.36     | 0.16    | 0.20          |
| *H <sub>2</sub> O   | –495.13               | 0.67     | 0.24    | 0.43          |
| Fe <sub>2</sub> @BP | E <sub>ads</sub> (eV) | ZPE (eV) | TS (eV) | ZPE – TS (eV) |
| *CO <sub>2</sub>    | –510.99               | 0.38     | 0.30    | 0.08          |
| *COOH               | –514.18               | 0.70     | 0.34    | 0.36          |
| *CO                 | –517.68               | 0.87     | 0.39    | 0.48          |
| *HCO                | –506.72               | 0.53     | 0.31    | 0.22          |
| *H <sub>2</sub> CO  | –510.64               | 0.85     | 0.25    | 0.60          |
| *H <sub>2</sub> COH | –513.87               | 1.16     | 0.30    | 0.86          |

|                      |                       |          |         |               |
|----------------------|-----------------------|----------|---------|---------------|
| *CH <sub>3</sub> OH  | -518.83               | 1.37     | 0.38    | 0.99          |
| Fe <sub>2</sub> @BP  | E <sub>ads</sub> (eV) | ZPE (eV) | TS (eV) | ZPE - TS (eV) |
| *CO <sub>2</sub>     | -510.99               | 0.38     | 0.30    | 0.08          |
| *HCOO                | -514.94               | 0.68     | 0.35    | 0.33          |
| *HCOOH               | -517.95               | 0.98     | 0.36    | 0.62          |
| *H <sub>2</sub> COOH | -521.67               | 1.30     | 0.30    | 1.00          |
| *H <sub>2</sub> CO   | -524.82               | 1.46     | 0.37    | 1.09          |
| *H <sub>3</sub> CO   | -514.69               | 1.20     | 0.36    | 0.84          |
| *O                   | -518.90               | 1.38     | 0.41    | 0.97          |
| *OH                  | -498.65               | 0.44     | 0.22    | 0.22          |
| *H <sub>2</sub> O    | -500.55               | 0.77     | 0.26    | 0.51          |
| Fe <sub>3</sub> @BP  | E <sub>ads</sub> (eV) | ZPE (eV) | TS (eV) | ZPE - TS (eV) |
| *CO <sub>2</sub>     | -517.74               | 0.43     | 0.39    | 0.04          |
| *COOH                | -520.89               | 0.71     | 0.43    | 0.28          |
| *CO                  | -525.07               | 0.98     | 0.49    | 0.49          |
| *HCO                 | -513.29               | 0.57     | 0.40    | 0.17          |
| *H <sub>2</sub> CO   | -517.13               | 0.82     | 0.39    | 0.43          |
| *H <sub>2</sub> COH  | -520.36               | 1.16     | 0.44    | 0.72          |
| *CH <sub>3</sub> OH  | -525.64               | 1.37     | 0.49    | 0.88          |
| Fe <sub>3</sub> @BP  | E <sub>ads</sub> (eV) | ZPE (eV) | TS (eV) | ZPE - TS (eV) |
| *CO <sub>2</sub>     | -517.74               | 0.43     | 0.39    | 0.04          |
| *HCOO                | -521.44               | 0.79     | 0.42    | 0.37          |
| *HCOOH               | -524.37               | 0.97     | 0.42    | 0.55          |
| *HCO                 | -528.64               | 1.26     | 0.39    | 0.87          |
| *H <sub>2</sub> CO   | -517.01               | 0.87     | 0.42    | 0.45          |
| *H <sub>3</sub> CO   | -520.53               | 1.21     | 0.42    | 0.79          |
| *O                   | -523.65               | 1.49     | 0.40    | 1.09          |
| *OH                  | -504.59               | 0.45     | 0.40    | 0.05          |
| *H <sub>2</sub> O    | -508.04               | 0.75     | 0.39    | 0.36          |

**Table S3** The free energy values of Fe<sub>n</sub> (n = 1–3) doped BP sheet in Fig. 5a, c, e.

| Fe <sub>1</sub> @BP | $\Delta G$ (eV) | Uphill potentials (V) |
|---------------------|-----------------|-----------------------|
| *H                  | -0.68           | -0.68                 |
| *COOH               | -0.49           |                       |
| *CO                 | -1.66           |                       |
| CO                  | -0.62           | -1.04                 |
| *HCO                | -1.08           | -0.58                 |
| *H <sub>2</sub> CO  | -0.53           | -0.55                 |
| *H <sub>2</sub> COH | 0.10            | -0.63                 |
| *CH <sub>3</sub> OH | -1.29           |                       |
| CH <sub>3</sub> OH  | -0.70           | -0.59                 |
| Fe <sub>1</sub> @BP | $\Delta G$ (eV) | U <sub>L</sub> (V)    |
| *H                  | -0.68           | -0.68                 |
| *HCOO               | -0.98           |                       |
| *HCOOH              | -0.89           | -0.09                 |
| HCOOH               | -0.01           | -0.88                 |
| *HCO                | -0.12           | -0.77                 |
| *H <sub>2</sub> CO  | -1.32           |                       |
| *H <sub>3</sub> CO  | -1.49           |                       |
| *O                  | -0.77           | -0.72                 |
| *O+CH <sub>4</sub>  | -1.12           | 0.35                  |
| *OH                 | -2.27           |                       |
| *H <sub>2</sub> O   | -1.93           |                       |
| H <sub>2</sub> O    | -1.68           | -0.25                 |
| Fe <sub>2</sub> @BP | $\Delta G$ (eV) | U <sub>L</sub> (V)    |
| *H                  | -0.89           | -0.89                 |
| *COOH               | -0.83           |                       |

|                      |                 |                    |
|----------------------|-----------------|--------------------|
| *CO                  | -0.75           | -0.08              |
| CO                   | 1.65            | -2.40              |
| *HCO                 | -0.88           |                    |
| *H <sub>2</sub> CO   | -0.96           |                    |
| *H <sub>2</sub> COH  | -0.48           | -0.48              |
| *CH <sub>3</sub> OH  | -1.84           |                    |
| CH <sub>3</sub> OH   | -1.39           | -0.45              |
| <hr/>                |                 |                    |
| Fe <sub>2</sub> @BP  | $\Delta G$ (eV) | U <sub>L</sub> (V) |
| *H                   | -0.89           | -0.89              |
| *HCOO                | -1.62           |                    |
| *HCOOH               | -0.89           | -0.73              |
| HCOOH                | 1.24            | -2.13              |
| *H <sub>2</sub> COOH | -0.76           | -0.13              |
| *H <sub>2</sub> CO   | -0.36           | -0.40              |
| *H <sub>3</sub> CO   | -1.32           |                    |
| *O                   | -1.93           |                    |
| *O+CH <sub>4</sub>   | -2.01           | 0.07               |
| *OH                  | -2.41           |                    |
| *H <sub>2</sub> O    | -2.57           |                    |
| H <sub>2</sub> O     | -2.47           | -0.10              |
| <hr/>                |                 |                    |
| Fe <sub>3</sub> @BP  | $\Delta G$ (eV) | U <sub>L</sub> (V) |
| *H                   | -0.93           | -0.93              |
| *COOH                | -0.58           |                    |
| *CO                  | -1.09           |                    |
| CO                   | 2.15            | -2.61              |
| *HCO                 | -0.46           | -0.63              |
| *H <sub>2</sub> CO   | -0.58           |                    |
| *H <sub>2</sub> COH  | -0.06           | -0.52              |
| *CH <sub>3</sub> OH  | -1.73           |                    |

|                     |                 |                    |
|---------------------|-----------------|--------------------|
| CH <sub>3</sub> OH  | -1.21           | -0.52              |
| Fe <sub>3</sub> @BP | $\Delta G$ (eV) | U <sub>L</sub> (V) |
| *H                  | -0.93           | -0.93              |
| *HCOO               | -1.04           |                    |
| *HCOOH              | -0.33           | -0.71              |
| HCOOH               | 0.92            | -1.25              |
| *HCO                | -0.82           |                    |
| *H <sub>2</sub> CO  | -0.45           | -0.37              |
| *H <sub>3</sub> CO  | -0.17           | -0.28              |
| *O                  | 0.49            | -0.66              |
| *O+CH <sub>4</sub>  | -1.78           | 2.27               |
| *OH                 | -1.49           |                    |
| *H <sub>2</sub> O   | -1.17           | -0.32              |
| H <sub>2</sub> O    | -0.54           | -0.63              |

## Reference

- 1 J. K. Nørskov, J. Rossmeisl, A. Logadottir, L. Lindqvist, J. R. Kitchin, T. Bligaard, H. Jonsson, *J. Phys. Chem. B.*, 2004, **108**, 17886-17892; bY. Jiao, Y. Zheng, M. Jaroniec, S. Z. Qiao, *J. Am. Chem. Soc.*, 2014, **136**, 4394-4403.
- 2 K. Mathew, R. Sundararaman, K. Letchworth-Weaver, T. A. Arias and R. G. Hennig, *J. Chem. Phys.*, 2014, **140**, 084106–084114.
- 3 K. Letchworth-Weaver and T. A. Arias, *Phys. Rev. B: Condens. Matter Mater. Phys.*, 2012, **86**, 075140–075155.
- 4 Q. Zhang and A. Asthagiri, *Catal. Today*, 2019, **323**, 35–43.
- 5 M. W. Chase Jr, *NIST-JANAF Thermochemical Tables*, American Institute of Physics for the National Institute of Standards and Technology, Washington, DC, New York, 1998.
